# Supplementary material for: Chocolate and risk of chronic disease: a systematic review and dose-response meta-analysis
Source: Springer Nature journal article supplement (doi:10.1007/s00394-019-01914-9), 2019-02-25
Supplement: MOESM1 [file 16506082]

# Chocolate and risk of chronic disease: a systematic review and dose-response meta-analysis

Jakub Morze<sup>1</sup>, Carolina Schwedhelm<sup>2,3</sup>, Aleksander Bencic<sup>2</sup>, Georg Hoffmann<sup>4</sup>, Heiner Boeing<sup>2</sup>,  
Katarzyna Przybylowicz<sup>1</sup>, Lukas Schwingshackl<sup>2,3,5</sup>

<sup>1</sup>Department of Human Nutrition, University of Warmia and Mazury, ul. Sloneczna 45f,  
10-718 Olsztyn, Poland

<sup>2</sup>Department of Epidemiology, German Institute of Human Nutrition Potsdam-Rehbruecke (DIfE),  
Arthur-Scheunert-Allee 114-116, 14558 Nuthetal, Germany

<sup>3</sup>NutriAct-Competence Cluster Nutrition Research Berlin-Potsdam, 14458 Nuthetal, Germany

<sup>4</sup>Department of Nutritional Sciences, University of Vienna, Althanstraße 14, UZA II, 1090 Vienna,  
Austria

<sup>5</sup>Institute for Evidence in Medicine, Medical Center, University of Freiburg, Faculty of Medicine,  
University of Freiburg, Freiburg, Germany.

Corresponding author: Lukas Schwingshackl, PhD

Breisacher Straße 153, 79110 Freiburg, Germany

M: schwingshackl@ifem.uni-freiburg.de

T: +49 (0)761 203-96867

**ELECTRONIC SUPPLEMENTARY MATERIAL**

**Abbreviations:**

95%CI – 95% Confidence Interval;

ARIC – Atherosclerosis Risk in Communities Cohorts;

CHD – Coronary Heart Disease;

COSM – Cohort of Swedish Men;

COOW – Prospective Study of Clinical Outcomes in Older Women;

E3N – Etude Epidémiologique auprès de femmes de la Mutuelle Générale de l'Education Nationale;

EPIC – European Prospective Investigation into Cancer and Nutrition;

FHS – Framingham Heart Study;

HR – Hazard Ratio;

IWHS – Iowa Women Health Study;

JPHC – Japan Public Health Center-based Prospective Study;

LWCS – Leisure World Cohort Study;

M – Men;

MEC – Multiethnic Cohort Study;

MSLS – Maine-Syracuse Longitudinal Study;

MVP – Million Veteran Program;

NA – Not applicable;

NHS – Nurses' Health Study;

OR – Odds Ratio;

PC – Prospective Cohort;

PHS- Physicians' Health Study;

RCT – Randomized Controlled Trial;

RR – Risk Ratio;

SHEEP – Stockholm Heart Epidemiology Program;

SMC – Swedish Mammography Cohort;

SUN – Seguimiento Universidad de Navarra Study;

T2D – Type 2 diabetes mellitus

TS – Takayama Study;

W – Women;

WHI – Women's Health Initiative;

ZES – Zutphen Elderly Study;

## **ESM Material 1:**

### PubMed search strategy:

#1 chocolate[tiab] OR cocoa[tiab]

#2 mortality[tiab] OR death[tiab]

#3 cardiovascular[tiab] OR coronary[tiab] OR stroke[tiab] OR vascular[tiab] OR myocardial infarction[tiab] OR heart failure[tiab]

#4 colon[tiab] OR rectum[tiab] OR rectal[tiab] OR colorectal[tiab] OR colorectum[tiab] OR bowel[tiab]

#5 diabetes[tiab]

#6 hypertension[tiab] OR hypertensive[tiab] OR systolic[tiab] OR diastolic[tiab] OR blood pressure[tiab]

#7 prospective[tiab] OR cohort[tiab] OR longitudinal[tiab] OR follow-up[tiab] OR case-cohort[tiab] OR nested case-control[tiab]

#8 (#1 AND (#2 OR #3 OR #4 OR #5 OR #6) AND #7)

Embase search strategy:

#1 chocolate.ti,ab. OR cocoa.ti,ab.

#2 mortality.ti,ab. OR death.ti,ab.

#3 cardiovascular.ti,ab. OR coronary.ti,ab. OR stroke.ti,ab. OR vascular.ti,ab. OR myocardial infraction.ti,ab. OR heart failure.ti,ab.

#4 colon.ti,ab. OR rectum.ti,ab. OR rectal.ti,ab. OR colorectal.ti,ab. OR colorectum.ti,ab. OR bowel.ti,ab.

#5 diabetes.ti,ab.

#6 hypertension.ti,ab. OR hypertensive.ti,ab. OR systolic.ti,ab. OR diastolic.ti,ab. OR blood pressure.ti,ab.

#7 prospective.ti,ab. OR cohort.ti,ab. OR longitudinal.ti,ab. OR follow-up.ti,ab. OR case-cohort.ti,ab. OR nested case-control.ti,ab.

#8 (#1 AND (#2 OR #3 OR #4 OR #5 OR #6) AND #7)

Web of Science search strategy:

#1 TS=chocolate OR TS=cocoa

#2 TS=mortality OR TS=death

#3 TS=cardiovascular OR TS=coronary OR TS=stroke OR TS=vascular OR TS=myocardial infraction OR TS=heart failure

#4 TS=colon OR TS=rectum OR TS=rectal OR TS=colorectal OR TS=colorectum OR TS=bowel

#5 TS=diabetes

#6 TS=hypertension OR TS=hypertensive OR TS=systolic OR TS=diastolic OR TS=blood pressure

#7 TS=prospective OR TS=cohort OR TS=longitudinal OR TS=follow-up OR TS=case-cohort OR TS=nested case-control

#8 (#1 AND (#2 OR #3 OR #4 OR #5 OR #6) AND #7)

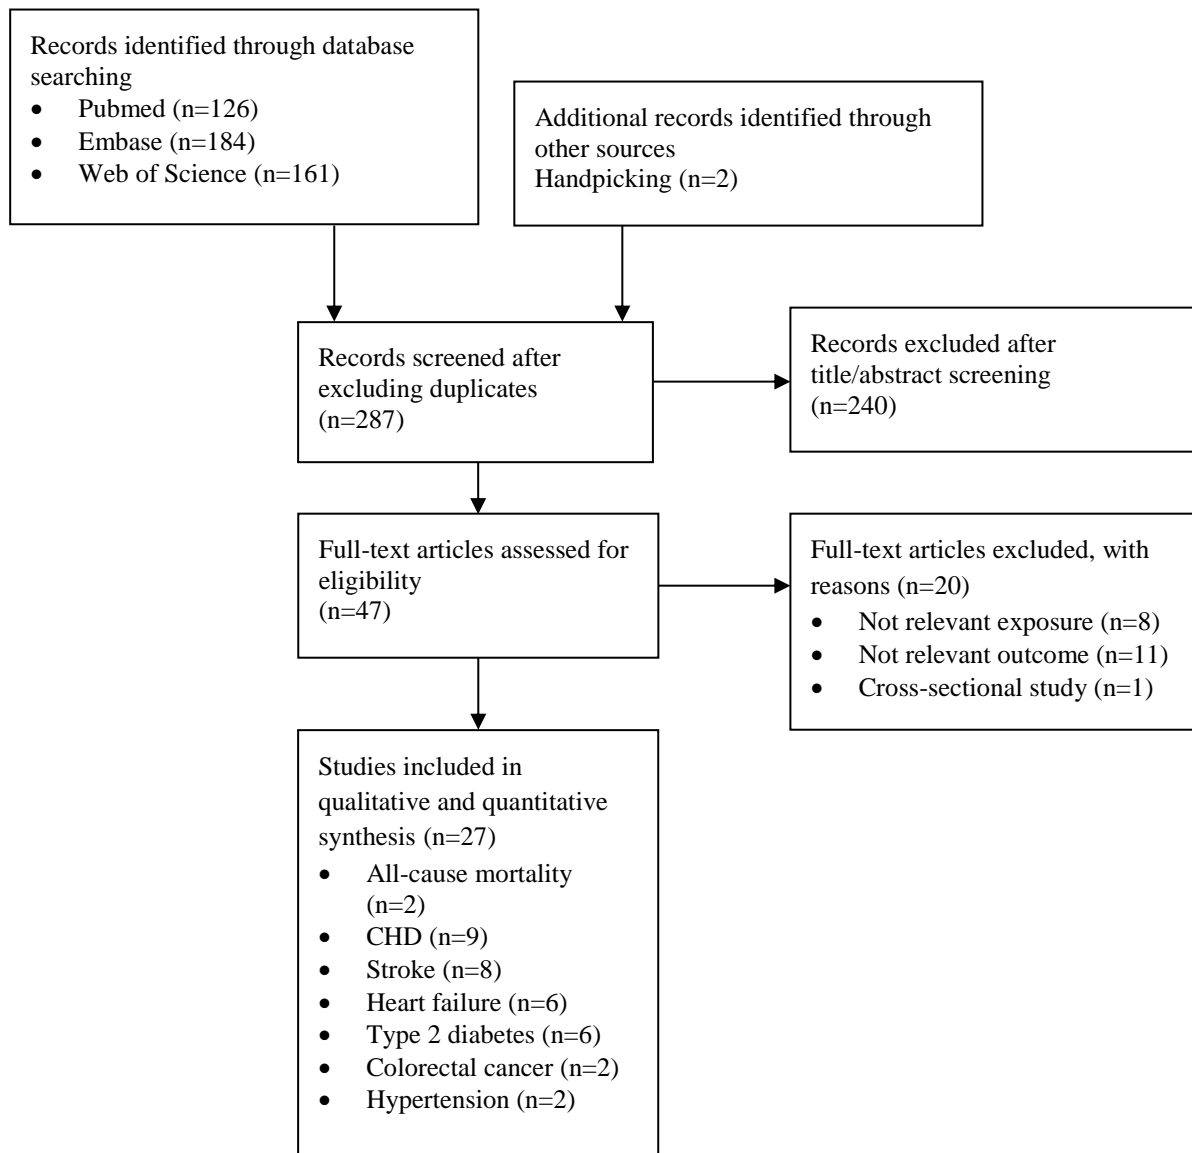

**ESM Fig 1:** Flow diagram illustrating identification and study selection process

**ESM Material 2:** Full-text articles with reason for exclusion

| References | Reason for exclusion  |
|------------|-----------------------|
| [1-8]      | Exposure not relevant |
| [9-19]     | Outcome not relevant  |
| [20]       | Cross-sectional study |

**ESM Table 1:** General study characteristics of the included studies investigating the association between chocolate intake and risk of all-cause mortality, coronary heart disease, stroke, heart failure, type 2 diabetes, and hypertension.

| Author & Year           | Study name & Country   | Study Design | Age at entry | Sex | Sample size | Total cases | Dietary assessment | Outcome               | Outcome assessment                                             | Exposure               | Adjustment factors                                                                                                                                                                                                                                                                                            | Follow up years | Consumption frequency or amount  | RR/HR/OR (95% CI)                                                                        |
|-------------------------|------------------------|--------------|--------------|-----|-------------|-------------|--------------------|-----------------------|----------------------------------------------------------------|------------------------|---------------------------------------------------------------------------------------------------------------------------------------------------------------------------------------------------------------------------------------------------------------------------------------------------------------|-----------------|----------------------------------|------------------------------------------------------------------------------------------|
| Alonso et. al. (2005)   | SUN (Spain)            | PC           | 35.8         | M&W | 5880        | 180         | Validated FFQ      | Hypertension          | Self-reported                                                  | Chocolate (All-source) | Age, sex, BMI, physical activity, alcohol consumption, sodium intake, total energy intake, smoking, hypercholesterolemia, low-fat dairy consumption                                                                                                                                                           | 2               | g/d<br>0<br>2<br>4<br>6<br>18    | 1.00<br>0.60 (0.40, 1.10)<br>0.90 (0.50, 1.50)<br>1.40 (0.90, 2.40)<br>1.10 (0.70, 1.80) |
| Buijsse et. al. (2010)  | EPIC-Potsdam (Germany) | PC           | 35-65        | M&W | 19357       | 166         | Validated FFQ      | Myocardial infarction | Self-reported (verified by medical records)/ Death certificate | Chocolate (All-source) | Age, sex, alcohol intake, employment status, BMI, waist circumference, smoking status, occupational physical activity, sports, cycling, education, total energy intake, energy-adjusted intakes of fruit, vegetables, red meat, processed meat, dairy, coffee, tea, and cereal fibres, prevalence of diabetes | 8.1             | g/d<br>1.7<br>1.9<br>3.3<br>7.5  | 1.00<br>0.65 (0.40, 1.05)<br>1.02 (0.65, 1.60)<br>0.73 (0.47, 1.15)                      |
|                         |                        |              |              |     |             | 136         |                    | Stroke                |                                                                |                        |                                                                                                                                                                                                                                                                                                               |                 |                                  |                                                                                          |
| Crichton et. al. (2017) | MSLS (USA)             | PC           | 24-96        | M&W | 590         | 30          | Validated FFQ      | T2D                   | Medical examination                                            | Chocolate (Pure)       | Age, education, sex, ethnicity, total cholesterol, obesity, hypertension, CRP, physical activity, total grains, coffee, red wine                                                                                                                                                                              | 4.7             | servings/wk<br><1<br>1<br>>1     | 1.91 (1.03; 3.55)<br>1.27 (0.64; 2.52)<br>1.00                                           |
| Dong et. al. (2017)     | JPHC (Japan)           | PC           | 44-76        | M&W | 84597       | M: 2025     | Validated FFQ      | Stroke                | Medical records                                                | Chocolate (Pure)       | Age, area, BMI, smoking, sports, occupation, medication use for hypertension and hypercholesterolemia, intakes of alcohol, total energy, green tea,                                                                                                                                                           | 12.9            | g/wk<br>0<br>5.8<br>11.6<br>37.5 | 1.00<br>0.98 (0.86, 1.13)<br>1.08 (0.96, 1.22)<br>0.94 (0.80, 1.10)                      |



|                          |            |    |       |     |        |         |               |        |                                     |                        |                                                                                                                                                                                                                                                                                                                      |      |  |                                                                                                                  |
|--------------------------|------------|----|-------|-----|--------|---------|---------------|--------|-------------------------------------|------------------------|----------------------------------------------------------------------------------------------------------------------------------------------------------------------------------------------------------------------------------------------------------------------------------------------------------------------|------|--|------------------------------------------------------------------------------------------------------------------|
|                          |            |    |       |     |        | F: 1533 |               |        |                                     |                        | coffee, fish/seafood, meat, fruits, soy foods, vegetable                                                                                                                                                                                                                                                             |      |  | g/wk<br>0 1.00<br>5.8 0.90 (0.78, 1.04)<br>11.6 0.97 (0.84, 1.11)<br>37.5 0.84 (0.71, 0.99)                      |
| Greenberg et. al. (2015) | ARIC (USA) | PC | 45-64 | M&W | 7802   | 861     | FFQ           | T2D    | Medical Examination                 | Chocolate (All-source) | Age, race, sex, physical activity, smoking status, Keys Index of Dietary Quality, family history of diabetes, dietary energy intake, alcohol intake, educational level, occupational level,                                                                                                                          | 13.3 |  | g/d<br>0 1.00<br>2.8 0.87 (0.75, 1.02)<br>14.2 0.66 (0.53, 0.82)<br>35.4 0.82 (0.62, 1.10)                       |
| Greenberg et. al. (2017) | WHI (USA)  | PC | 50-79 | W   | 92678  | 10804   | Validated FFQ | T2D    | Self-reported (validated)           | Chocolate (All-source) | Age, race/ethnic status, WHI Study arm, family history of diabetes, smoking status, total recreational energy expended in MET-h per week, coffee in cups per day, non-chocolate energy intake, Alternative Modified Health Eating Index, education, family income, physical functional ability, emotional well being | 13.1 |  | g/d<br>0 1.00<br>0.8 0.97 (0.92, 1.04)<br>2 0.92 (0.87, 0.98)<br>5.6 0.93 (0.88, 0.98)<br>22.1 0.98 (0.92, 1.04) |
| Greenberg et. al. (2018) | WHI (USA)  | PC | 50-79 | W   | 83310  | 3246    | Validated FFQ | CHD    | Medical records/ Death certificates | Chocolate (All-source) | Age, race/ethnicity, WHI study arm, Alternative Health Eating Index, nonchocolate daily energy intake, physical activity, smoking status, alcohol intake, educational level, income status, family history of CVD                                                                                                    | 13.4 |  | g/d<br>0 1.00<br>0.9 1.07 (0.96, 1.19)<br>2 1.06 (0.96, 1.18)<br>5.7 0.98 (0.89, 1.08)<br>22.5 1.03 (0.92, 1.15) |
|                          |            |    |       |     |        | 2624    |               | Stroke |                                     |                        |                                                                                                                                                                                                                                                                                                                      |      |  | g/d<br>0 1.00<br>0.9 1.07 (0.95, 1.21)<br>2 1.04 (0.92, 1.17)<br>5.7 0.97 (0.87, 1.09)<br>22.5 1.09 (0.96, 1.23) |
| Ho et. al. (2018)        | MVP (USA)  | PC | 64    | M&W | 148465 | 9040    | FFQ           | CHD    | Medical records                     | Chocolate (Pure)       | Age, sex, race, lifestyle factors                                                                                                                                                                                                                                                                                    | 2.6  |  | g/d<br>0 1.00<br>1 0.93 (0.86, 1.12)<br>4 0.91 (0.82, 1.00)<br>12 0.91 (0.82, 1.00)<br>24.4 0.89 (0.80, 0.99)    |

|                        |                   |    |       |     |       |      |                            |                                 |                                                          |                        |                                                                                                                                                                                                                                                     |      |                                                                                                                    |
|------------------------|-------------------|----|-------|-----|-------|------|----------------------------|---------------------------------|----------------------------------------------------------|------------------------|-----------------------------------------------------------------------------------------------------------------------------------------------------------------------------------------------------------------------------------------------------|------|--------------------------------------------------------------------------------------------------------------------|
| Hu et. al. (2000)      | NHS (USA)         | PC | 34-59 | W   | 80082 | 939  | Validated FFQ              | CHD                             | Medical records/<br>Self-reported/<br>Death certificates | Chocolate (Pure)       | Age, time period, BMI, cigarette smoking, menopausal status, parental history of myocardial infarction before age 60 y, vitamin E supplement use, alcohol consumption, history of hypertension, aspirin use, vigorous exercise, total energy intake | 14   | g/d<br>0 1.00<br>0.5 1.15 (0.96, 1.37)<br>4 1.08 (0.88, 1.32)<br>14 1.11 (0.92, 1.34)                              |
| Janszky et. al. (2009) | SHEEP (Sweden)    | PC | 45-70 | M&W | 1169  | 210  | Standardized questionnaire | All-cause mortality             | Death certificates/<br>Medical records                   | Chocolate (Pure)       | Age, gender, smoking, obesity, physical inactivity, alcohol consumption, filtered coffee consumption, educational attainment, sweet score                                                                                                           | 8.7  | g/d<br>0 1.00<br>0.9 0.89 (0.56, 1.42)<br>4.4 0.96 (0.63, 1.48)<br>17 0.94 (0.58, 1.53)                            |
|                        |                   |    |       |     |       | 250  |                            | Recurrent myocardial infarction |                                                          |                        |                                                                                                                                                                                                                                                     |      | g/d<br>0 1.00<br>0.9 0.95 (0.61, 1.49)<br>4.4 1.02 (0.68, 1.55)<br>17 0.86 (0.54, 1.37)                            |
|                        |                   |    |       |     |       | 279  |                            | Congestive heart failure        |                                                          |                        |                                                                                                                                                                                                                                                     |      | g/d<br>0 1.00<br>0.9 0.82 (0.56, 1.19)<br>4.4 0.68 (0.47, 0.97)<br>17 0.78 (0.52, 1.16)                            |
|                        |                   |    |       |     |       | 111  |                            | Stroke                          |                                                          |                        |                                                                                                                                                                                                                                                     |      | g/d<br>0 1.00<br>0.9 0.67 (0.36, 1.23)<br>4.4 0.54 (0.30, 0.96)<br>17 0.62 (0.33, 1.16)                            |
| Kwok et. al. (2015)    | EPIC-Norfolk (UK) | PC | 59    | M&W | 16162 | 1754 | Validated FFQ              | CHD                             | Medical records/<br>Death certificates                   | Chocolate (All-source) | Age, sex, smoking, physical activity, energy intake, alcohol consumption, diabetes, BMI, systolic blood pressure, LDL cholesterol, HDL cholesterol, CRP                                                                                             | 11.3 | g/d<br>0 1.00<br>1.1 1.00 (0.87, 1.14)<br>1.6 0.98 (0.84, 1.13)<br>9.2 0.87 (0.75, 1.01)<br>24.9 0.82 (0.70, 0.97) |
|                        |                   |    |       |     |       | 648  |                            | Stroke                          |                                                          |                        |                                                                                                                                                                                                                                                     |      | g/d<br>0 1.00<br>1.1 0.95 (0.76, 1.18)<br>1.6 0.87 (0.67, 1.11)<br>9.2 0.94 (0.74, 1.18)<br>24.9 0.80 (0.62, 1.05) |

|                        |                     |               |       |     |       |      |               |                        |                                     |                        |                                                                                                                                                                                                                                                                                                                |      |             |                                                                                                             |
|------------------------|---------------------|---------------|-------|-----|-------|------|---------------|------------------------|-------------------------------------|------------------------|----------------------------------------------------------------------------------------------------------------------------------------------------------------------------------------------------------------------------------------------------------------------------------------------------------------|------|-------------|-------------------------------------------------------------------------------------------------------------|
| Kwok et. al. (2016)    | EPIC-Norfolk (UK)   | PC            | 58    | M&W | 20922 | 1101 | Validated FFQ | Heart failure          | Medical records/ Death certificates | Chocolate (All-source) | Age, sex, education, BMI, social class, physical activity, smoking status, dietary energy, alcohol consumption, myocardial infarction, diabetes, arrhythmia, systolic blood pressure, cholesterol level, heart rate                                                                                            | 12.5 | g/d         | 0 1.00<br>0.8 0.92 (0.77, 1.11)<br>4.1 0.96 (0.80, 1.15)<br>8.7 0.89 (0.74, 1.06)<br>24.9 0.87 (0.71, 1.06) |
| Lajous et. al. (2016)  | E3N (France)        | PC            | 45-58 | W   | 40574 | 9350 | Validated FFQ | Hypertension           | Self-reported/ Medical records      | Chocolate (Pure)       | Age, energy, education, history of hypertension, diabetes, hypercholesterolemia, BMI, smoking, physical activity metabolic equivalents, hormone therapy                                                                                                                                                        | 13.8 | Q1<br>Q5    | 1.00<br>0.97 (0.91, 1.03)                                                                                   |
| Larsson et. al. (2011) | SMC (Sweden)        | PC            | 49-83 | W   | 33372 | 1548 | Validated FFQ | Stroke                 | Medical records/ Death certificates | Chocolate (Pure)       | Age, education, smoking status, BMI, total physical activity, aspirin use, self-reported history of hypertension, diagnosis of atrial fibrillation, family history of myocardial infarction before 60 years of age, intake of total energy alcohol, coffee, tea, fresh read meat, fish, fruits, and vegetables | 10.4 | g/d         | 1.3 1.00<br>2.0 1.04 (0.86, 1.25)<br>4.1 0.94 (0.82, 1.08)<br>9.5 0.80 (0.66, 0.99)                         |
| Larsson et. al. (2012) | COSM (Sweden)       | PC            | 45-79 | M   | 37103 | 1995 | Validated FFQ | Stroke                 | Medical records/ Death certificates | Chocolate (Pure)       | Age, education, smoking status, pack-years of smoking, BMI, total physical activity, aspirin use, history of hypertension, atrial fibrillation, family history of myocardial infarction, intakes of total energy, alcohol, coffee, tea, fresh read meat, fish, fruits, and vegetables                          | 10.2 | g/d         | 0 1.00<br>1.8 0.94 (0.84, 1.05)<br>5.5 0.95 (0.83, 1.08)<br>9 0.83 (0.70, 0.99)                             |
| Larsson et. al. (2016) | COSM & SMC (Sweden) | PC            | 45-83 | M&W | 67640 | 4417 | Validated FFQ | Myocardial infarction  | Medical records/ Death certificates | Chocolate (Pure)       | Age, sex, education, family history of MI before 60 years of age, aspirin, walking/bicycling, intakes of total energy, alcohol, processed meat, fruits and vegetables, BMI, history and diagnosis of diabetes, hypertension, hypercholesterolemia                                                              | 13   | g/d         | 0 1.00<br>1.9 0.91 (0.84, 0.99)<br>6 0.89 (0.81, 0.97)<br>14 0.87 (0.77, 0.98)                              |
| Lewis et. al. (2010)   | COOW (USA)          | RCT follow-up | ≥70   | W   | 1216  | 153  | Validated FFQ | Ischemic heart disease | Medical records/ Death              | Chocolate (Pure)       | Age, BMI, socioeconomic status, energy intake at baseline                                                                                                                                                                                                                                                      | 9.5  | servings/wk | <1 1.00<br>≥1 0.65 (0.46, 0.94)                                                                             |

|                           |              |    |       |     |        |      |               |                   |                                                                   |                        |                                                                                                                                                                                                                                                                     |     |                                                                                                                     |
|---------------------------|--------------|----|-------|-----|--------|------|---------------|-------------------|-------------------------------------------------------------------|------------------------|---------------------------------------------------------------------------------------------------------------------------------------------------------------------------------------------------------------------------------------------------------------------|-----|---------------------------------------------------------------------------------------------------------------------|
|                           |              |    |       |     |        | 53   |               | Heart failure     | certificates                                                      |                        |                                                                                                                                                                                                                                                                     |     | serving/wk<br>$<1$ 1.00<br>$\geq 1$ 0.41 (0.22, 0.76)                                                               |
| Makarem et. al. (2018)    | FHS (USA)    | PC | 26-84 | M&W | 3184   | 68   | Validated FFQ | Colorectal cancer | Medical records (verified by pathology report)/Death certificates | Chocolate (All-source) | Age, sex, smoking, alcohol, energy, fiber intake and red and processed meat intake. BMI, WC, chronic diseases (CVD and diabetes), education, physical activity, antioxidant use, percentage energy from fat, fruit and vegetable intake                             | 22  | serving/wk<br>$<0.5$ 1.00<br>$0.5-1.9$ 1.08 (0.62, 1.90)<br>$>1.9$ 0.74 (0.37, 1.46)                                |
| Maskarinec et. al. (2018) | MEC (USA)    | PC | 45-75 | M&W | 151691 | 8487 | Validated FFQ | T2D               | Self-reported (verified by medical records)                       | Chocolate (All-source) | Age, sex, ethnicity, BMI, smoking status, education, sleep duration, physical activity, DASH index, intakes of total energy, alcohol, coffee, soda, added sugar, red meat and dietary fiber                                                                         | 7.8 | g/d<br>0 1.00<br>3 0.97 (0.91, 1.03)<br>7 0.97 (0.91, 1.02)<br>13 0.90 (0.84, 0.97)                                 |
| Matsumoto et. al. (2015)  | PHS (USA)    | PC | 40-84 | M   | 18235  | 1123 | Validated FFQ | T2D               | Self-reported (validated by medical records)                      | Chocolate (Pure)       | Age, BMI, smoking, exercise, alcohol consumption, total caloric intake, intakes of whole grain, nuts, and red meat                                                                                                                                                  | 9.2 | g/d<br>0 1.00<br>1.9 0.93 (0.79, 1.09)<br>4 0.86 (0.72, 1.04)<br>10 0.83 (0.69, 0.99)                               |
| Mink et. al. (2007)       | IWHS (USA)   | PC | 55-69 | W   | 34489  | 469  | Validated FFQ | Death from stroke | Death certificates                                                | Chocolate (Pure)       | Age, energy intake, marital status, blood pressure, diabetes, BMI, waist-to-hip ration, physical activity, smoking, estrogen use                                                                                                                                    | 16  | servings/wk<br>0 1.00<br>$>0$ 0.85 (0.70, 1.03)                                                                     |
|                           |              |    |       |     |        | 1329 |               | Death from CHD    |                                                                   |                        |                                                                                                                                                                                                                                                                     |     | servings/wk<br>0 1.00<br>$>0$ 0.98 (0.88, 1.10)                                                                     |
| Mostofsky et. al. (2010)  | SMC (Sweden) | PC | 49-83 | W   | 31823  | 419  | Validated FFQ | Heart failure     | Medical records/ Death certificates                               | Chocolate (Pure)       | Total energy intake, age, education, BMI, physical activity, cigarette smoking, living alone, postmenopausal hormone use, alcohol consumption, family history of MI before age 60, self-reported history of hypertension, self-reported history of high cholesterol | 9   | g/d<br>0 1.00<br>1.6 0.74 (0.58, 0.95)<br>5.3 0.68 (0.50, 0.93)<br>15.8 1.09 (0.74, 1.62)<br>29.5 1.23 (0.73, 2.08) |
| Oba et. al. (2010)        | TS (Japan)   | PC | 35-70 | M   | 5897   | 278  | Validated FFQ | T2D               | Self-reported                                                     | Chocolate (All-source) | Age, smoking status, BMI, physical activity, length of education in years, alcohol consumption, total energy intake, fat intake, women's menopausal                                                                                                                 | 10  | g/d<br>0 1.00<br>0.7 0.84 (0.65, 1.09)<br>1.7 0.65 (0.43, 0.97)                                                     |

|                              |              |    |        |     |       |       |               |                     |                                              |                        |                                                                                                                                                                                                                  |     |                                                                                                                     |                                                                   |
|------------------------------|--------------|----|--------|-----|-------|-------|---------------|---------------------|----------------------------------------------|------------------------|------------------------------------------------------------------------------------------------------------------------------------------------------------------------------------------------------------------|-----|---------------------------------------------------------------------------------------------------------------------|-------------------------------------------------------------------|
|                              |              |    |        | W   | 7643  | 175   |               |                     |                                              |                        | status                                                                                                                                                                                                           |     |                                                                                                                     | g/d<br>0 1.00<br>0.7 0.70 (0.50, 0.98) /<br>1.9 0.73 (0.48, 1.13) |
| Paganini-Hill et. al. (2007) | LWCS (USA)   | PC | 44-101 | M&W | 13624 | 11386 | Questionnaire | All-cause mortality | Death certificates                           | Chocolate (All-source) | Age, sex, smoking, exercise, BMI, alcohol intake, history of hypertension, angina, heart attack, stroke, diabetes, rheumatoid arthritis and cancer                                                               | 23  | Frequency<br>None 1.00<br>Few times/y to few times/m 0.94 (0.90, 0.98)<br>Few times/wk to daily 0.98 (0.93, 1.04)   |                                                                   |
| Petrone et. al. (2014)       | PHS (USA)    | PC | 50-98  | M   | 20278 | 876   | Validated FFQ | Heart failure       | Self-reported (validated by medical records) | Chocolate (Pure)       | Age, BMI, alcohol, smoking exercise, caloric intake, prevalent atrial fibrillation                                                                                                                               | 9.3 | g/d<br>0 1.00<br>1.9 0.86 (0.72, 1.03)<br>4 0.80 (0.66, 0.98)<br>12.1 0.92 (0.74, 1.13)<br>24.2 0.82 (0.63, 1.07)   |                                                                   |
| Singh et. al. (2013)         | IWHS (USA)   | PC | 55-69  | W   | 35216 | 1298  | Validated FFQ | Colorectal cancer   | Medical Records/ Pathology report            | Chocolate (Pure)       | NA                                                                                                                                                                                                               | 34  | Frequency<br>Non-consumers >1 times/wk 1.00<br>1.14 (0.97, 1.33)                                                    |                                                                   |
| Steinhaus et. al. (2016)     | CSM (Sweden) | PC | 45-79  | M   | 31917 | 2157  | Validated FFQ | Heart failure       | Medical records/ Death certificates          | Chocolate (Pure)       | Age, total energy intake, DASH diet component score, education, BMI, physical activity, cigarette smoking, alcohol consumption, family history of MI, self-reported history of hypertension and high cholesterol | 14  | g/d<br>0 1.00<br>3.4 0.88 (0.78, 0.99)<br>7.3 0.83 (0.72, 0.94)<br>21.9 0.82 (0.68, 0.99)<br>46.1 1.10 (0.84, 1.45) |                                                                   |

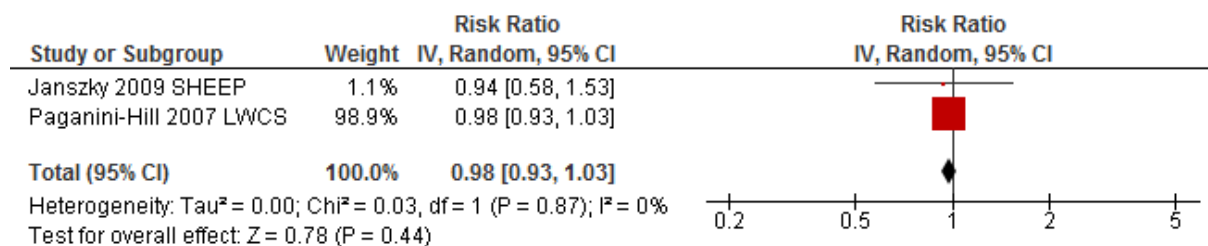

ESM Fig 2: Summary of relative risk of all-cause mortality for high versus low chocolate intake.

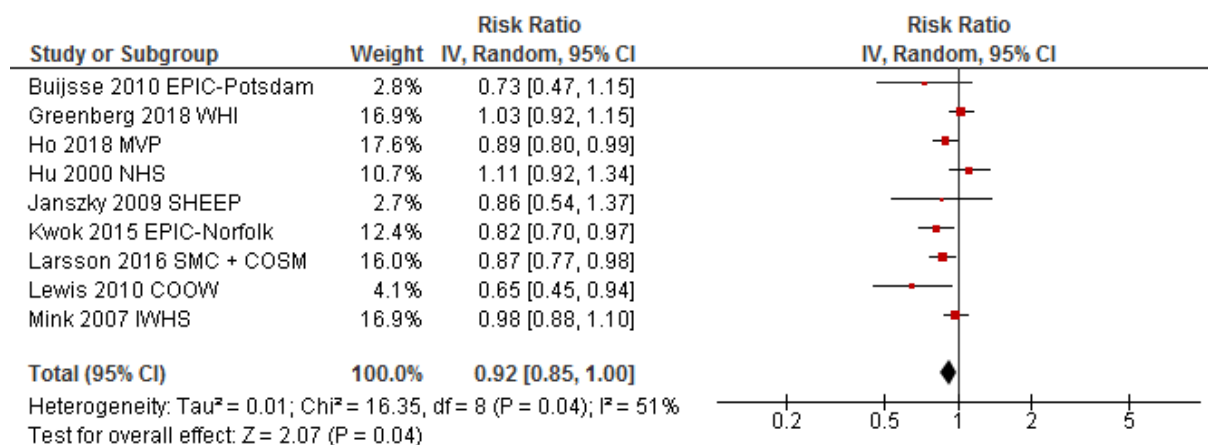

ESM Fig 3: Summary of relative risk of CHD for high versus low chocolate intake.

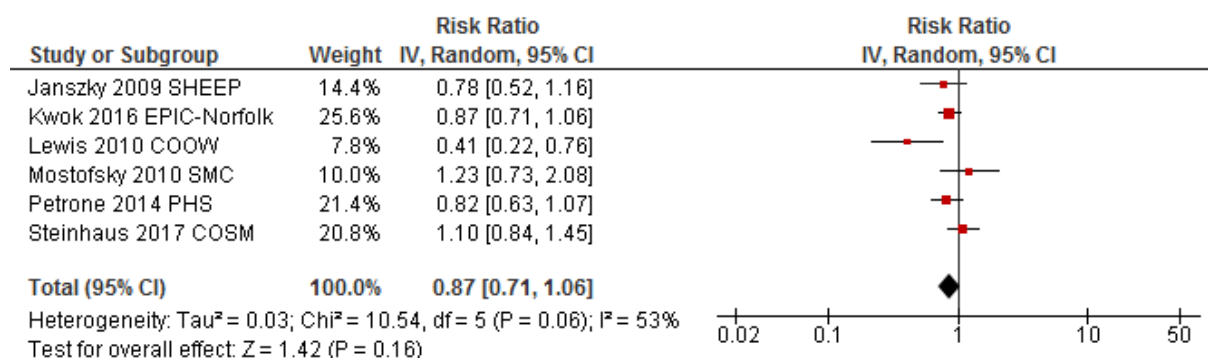

ESM Fig 4: Summary of relative risk of heart failure for high versus low chocolate intake.

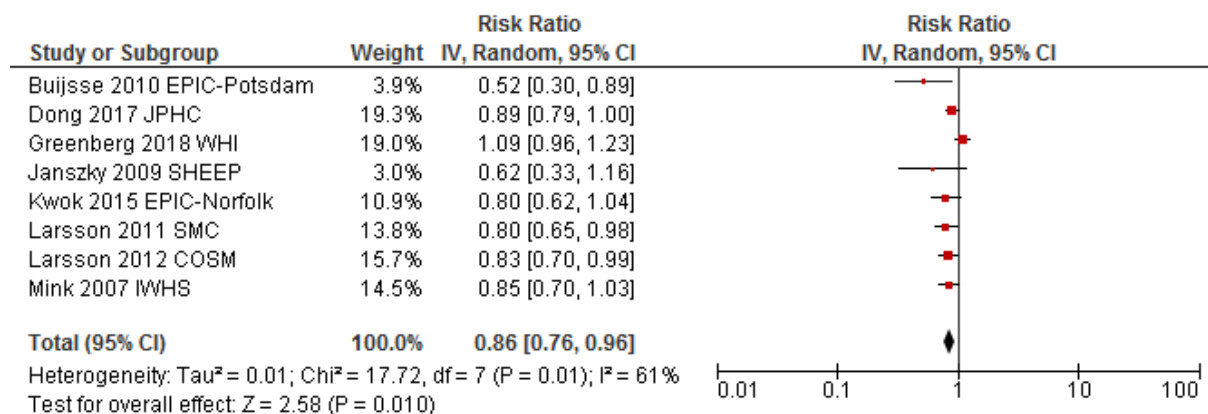

ESM Fig 5: Summary of relative risk of stroke for high versus low chocolate intake.

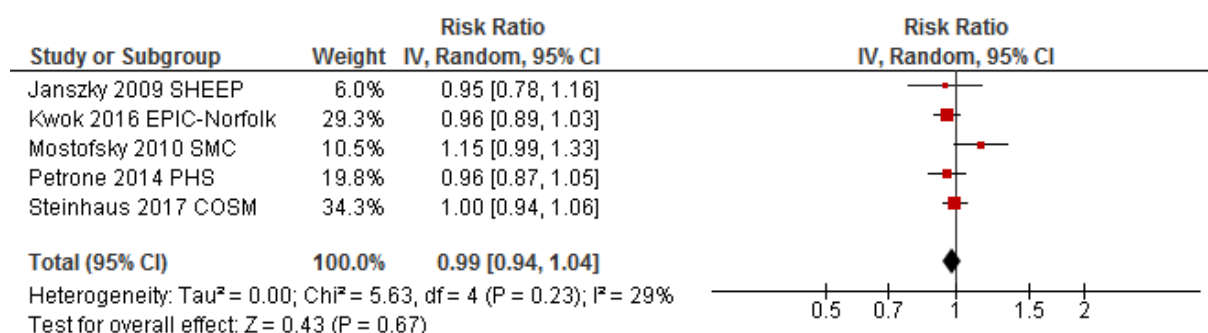

ESM Fig 6: Summary of relative risk of heart failure for each 10 g/d increase in chocolate intake.

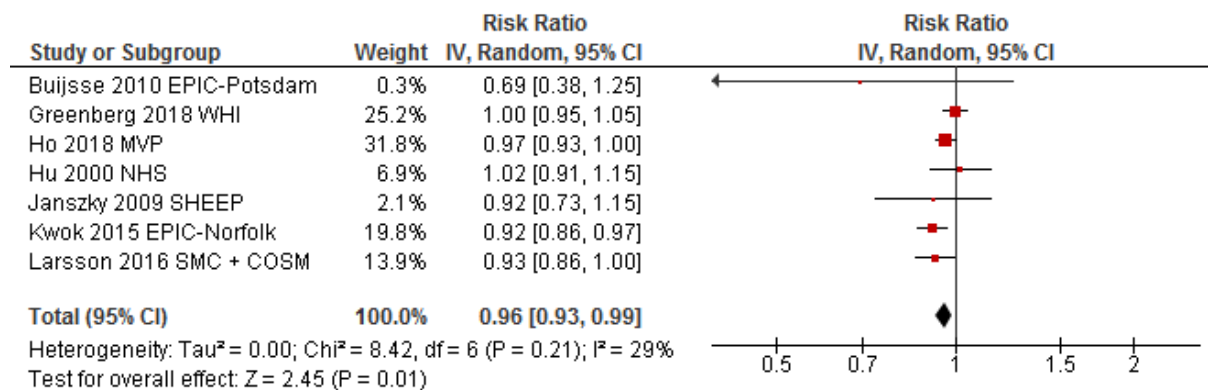

ESM Fig 7: Summary of relative risk of CHD for each 10 g/d increase in chocolate intake.

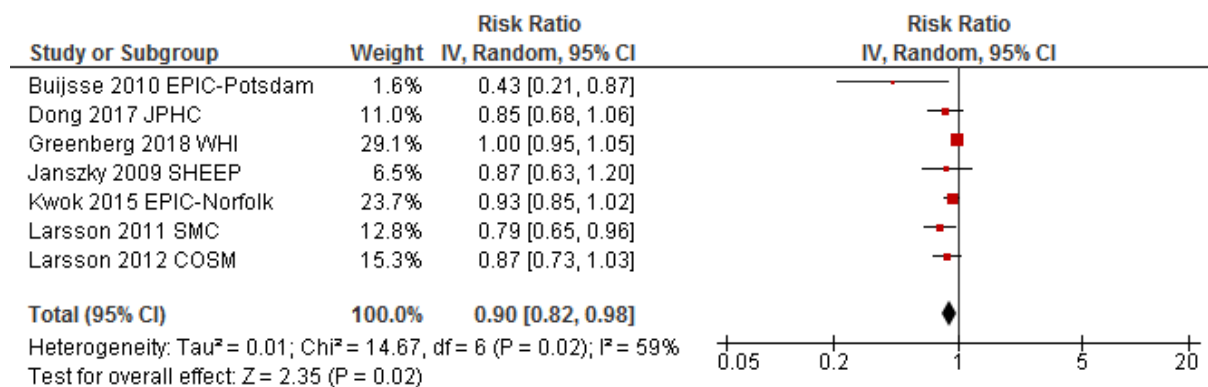

ESM Fig 8: Summary of relative risk of stroke for each 10 g/d increase in chocolate intake.

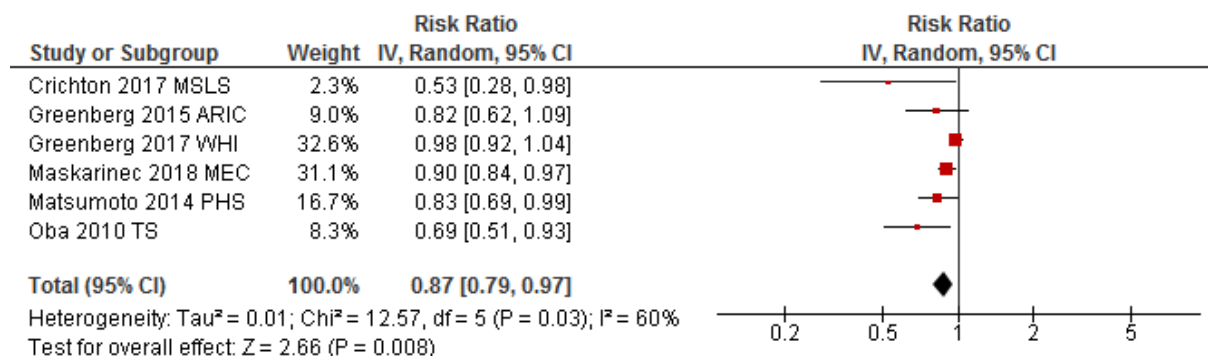

ESM Fig 9: Summary of relative risk of T2D for high versus low chocolate intake.

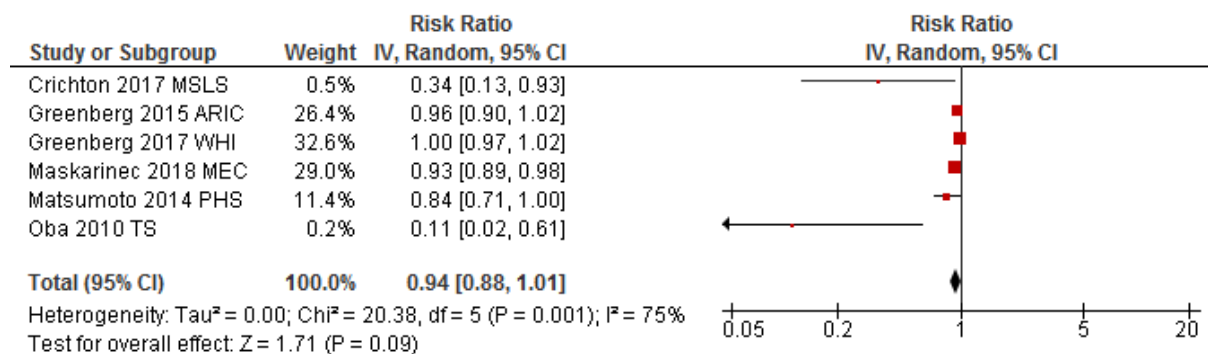

ESM Fig 10: Summary of relative risk of T2D for each 10 g/d increase in chocolate intake.

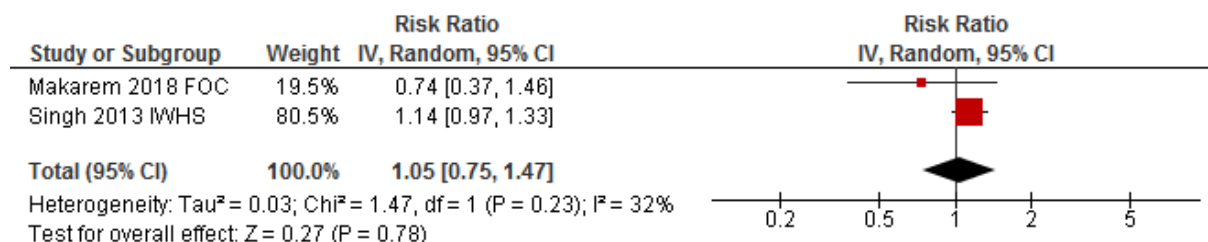

ESM Fig 11: Summary of relative risk of colorectal cancer for high versus low chocolate intake.



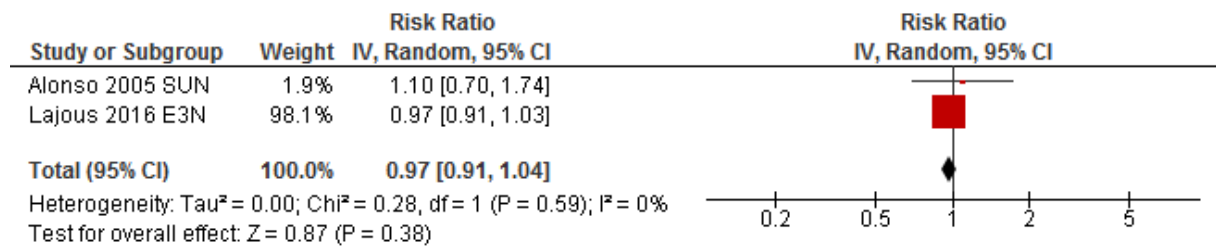

**ESM Fig 12:** Summary of relative risk of hypertension for high versus low chocolate intake.

**ESM Table 2:** Dose-response meta-analysis for each daily 10 gram increase in chocolate intake and risk of CHD, stratified by sex, follow-up, geographic location, and number of cases, dietary assessment, type of chocolate, and energy adjustment.

| <b>CHD</b>          | <b>No of studies</b> | <b>RR</b> | <b>95% CI</b> | <b>I<sup>2</sup> (%)</b> | <b>p-value for subgroup difference</b> |
|---------------------|----------------------|-----------|---------------|--------------------------|----------------------------------------|
| Dose-response       | 8                    | 0.96      | 0.93, 0.99    | 29                       |                                        |
| Sex                 |                      |           |               |                          |                                        |
| Men and women       | 6                    | 0.95      | 0.92, 0.97    | 0                        |                                        |
| Women               | 2                    | 1.00      | 0.96, 1.05    | 0                        |                                        |
| Follow-up           |                      |           |               |                          |                                        |
| ≥10 years           | 5                    | 0.96      | 0.91, 1.01    | 57                       | 0.93                                   |
| <10 years           | 3                    | 0.96      | 0.93, 1.00    | 0                        |                                        |
| Geographic location |                      |           |               |                          |                                        |
| Europe              | 5                    | 0.92      | 0.88, 0.96    | 0                        | 0.02                                   |
| America             | 3                    | 0.98      | 0.95, 1.01    | 0                        |                                        |
| Number of cases     |                      |           |               |                          |                                        |
| ≥1000               | 5                    | 0.96      | 0.93, 0.99    | 50                       | 0.65                                   |
| <1000               | 3                    | 0.98      | 0.88, 1.10    | 7                        |                                        |
| Dietary assessment* |                      |           |               |                          |                                        |
| not validated       | 1                    | 0.92      | 0.73, 1.15    | NA                       | 0.72                                   |
| validated           | 6                    | 0.96      | 0.91, 1.01    | 51                       |                                        |
| Type of chocolate   |                      |           |               |                          |                                        |
| Pure                | 5                    | 0.96      | 0.93, 0.99    | 0                        | 0.83                                   |
| Combined            | 3                    | 0.95      | 0.88, 1.04    | 68                       |                                        |
| Energy adjusted     |                      |           |               |                          |                                        |
| Yes                 | 6                    | 0.96      | 0.91, 1.01    | 51                       | 0.84                                   |
| No                  | 2                    | 0.96      | 0.93, 1.00    | 0                        |                                        |

\*No information for Ho et al. 2018 available

**ESM Table 3:** Dose-response meta-analysis for each daily 10 gram increase in chocolate intake and risk of stroke, stratified by sex, follow-up, geographic location, and number of cases, dietary assessment, type of chocolate, and energy adjustment.

| Stroke              | No of studies | RR   | 95% CI     | I <sup>2</sup> (%) | p-value for subgroup difference |
|---------------------|---------------|------|------------|--------------------|---------------------------------|
| Dose-response       | 7             | 0.90 | 0.82, 0.98 | 59                 |                                 |
| Sex                 |               |      |            |                    |                                 |
| Men and women       | 4             | 0.87 | 0.75, 1.01 | 39                 |                                 |
| Men                 | 1             | 0.87 | 0.73, 1.03 | NA                 | 0.77                            |
| Women               | 2             | 0.91 | 0.72, 1.14 | 81                 |                                 |
| Follow-up           |               |      |            |                    |                                 |
| ≥10 years           | 5             | 0.92 | 0.84, 1.00 | 57                 | 0.34                            |
| <10 years           | 2             | 0.66 | 0.33, 1.30 | 69                 |                                 |
| Geographic location |               |      |            |                    |                                 |
| Europe              | 5             | 0.86 | 0.77, 0.96 | 37                 | 0.03                            |
| America             | 1             | 1.00 | 0.95, 1.05 | NA                 |                                 |
| Asia                | 1             | 0.85 | 0.68, 1.06 | NA                 |                                 |
| Number of cases     |               |      |            |                    |                                 |
| ≥1000               | 4             | 0.90 | 0.79, 1.02 | 65                 | 0.63                            |
| <1000               | 3             | 0.83 | 0.64, 1.09 | 56                 |                                 |
| Dietary assessment  |               |      |            |                    |                                 |
| not validated       | 1             | 0.87 | 0.63, 1.20 | NA                 | 0.88                            |
| validated           | 6             | 0.89 | 0.81, 0.99 | 65                 |                                 |
| Type of chocolate   |               |      |            |                    |                                 |
| Pure                | 4             | 0.84 | 0.76, 0.93 | 0                  | 0.17                            |
| Combined            | 3             | 0.94 | 0.83, 1.07 | 71                 |                                 |
| Energy adjusted     |               |      |            |                    |                                 |
| Yes                 | 6             | 0.89 | 0.81, 0.99 | 65                 | 0.88                            |
| No                  | 1             | 0.87 | 0.63, 1.20 | NA                 |                                 |

**ESM Table 4:** Dose-response meta-analysis for each daily 10 gram increase in chocolate intake and risk of T2D, stratified by sex, follow-up, geographic location, and number of cases, dietary assessment, type of chocolate, and energy adjustment.

| <b>T2D</b>          | <b>No of studies</b> | <b>RR</b> | <b>95% CI</b> | <b>I<sup>2</sup> (%)</b> | <b>p-value for subgroup difference</b> |
|---------------------|----------------------|-----------|---------------|--------------------------|----------------------------------------|
| Dose-response       | 6                    | 0.94      | 0.88, 1.01    | 75                       |                                        |
| Sex                 |                      |           |               |                          |                                        |
| Men and women       | 4                    | 0.92      | 0.82, 1.04    | 71                       |                                        |
| Men                 | 1                    | 0.84      | 0.71, 1.00    | NA                       | 0.05                                   |
| Women               | 1                    | 1.00      | 0.97, 1.02    | NA                       |                                        |
| Follow-up           |                      |           |               |                          |                                        |
| ≥10 years           | 4                    | 0.96      | 0.86, 1.07    | 76                       | 0.50                                   |
| <10 years           | 2                    | 0.91      | 0.84, 0.99    | 26                       |                                        |
| Geographic location |                      |           |               |                          |                                        |
| Europe              | 5                    | 0.95      | 0.89, 1.01    | 72                       | 0.01                                   |
| Asia                | 1                    | 0.11      | 0.02, 0.61    | NA                       |                                        |
| Number of cases     |                      |           |               |                          |                                        |
| ≥1000               | 3                    | 0.95      | 0.88, 1.02    | 78                       | 0.16                                   |
| <1000               | 3                    | 0.42      | 0.13, 1.33    | 80                       |                                        |
| Dietary assessment  |                      |           |               |                          |                                        |
| not validated       | 2                    | 0.65      | 0.24, 1.72    | 75                       | 0.46                                   |
| validated           | 4                    | 0.94      | 0.86, 1.03    | 81                       |                                        |
| Type of chocolate   |                      |           |               |                          |                                        |
| Pure                | 2                    | 0.62      | 0.27, 1.42    | 67                       | 0.30                                   |
| Combined            | 4                    | 0.96      | 0.88, 1.01    | 75                       |                                        |
| Energy adjusted     |                      |           |               |                          |                                        |
| Yes                 | 5                    | 0.95      | 0.89, 1.01    | 75                       | 0.05                                   |
| No                  | 1                    | 0.34      | 0.13, 0.93    |                          |                                        |

**ESM Table 5:** Highest vs. lowest intake category meta-analysis, or linear dose-response meta-analysis NutriGrade judgements between chocolate intake and the risk of all-cause mortality, T2D, CHD, stroke, heart failure, colorectal cancer, and hypertension.

| <b>Outcome</b>      | <b>Comparison</b>  | <b>No of studies</b> | <b>RR</b> | <b>95% CI</b> | <b>I<sup>2</sup> (%)</b> | <b>NutriGrade grading</b> |
|---------------------|--------------------|----------------------|-----------|---------------|--------------------------|---------------------------|
| All-cause mortality | Highest vs. lowest | 2                    | 0.98      | 0.93, 1.03    | 0                        | Very low                  |
| CHD                 | Per 10 g/d         | 8                    | 0.96      | 0.93, 0.99    | 29                       | Low                       |
| Stroke              | Per 10 g/d         | 7                    | 0.90      | 0.82, 0.98    | 59                       | Low                       |
| Heart Failure       | Per 10 g/d         | 5                    | 0.99      | 0.94, 1.04    | 29                       | Very low                  |
| T2D                 | Per 10 g/d         | 6                    | 0.94      | 0.88, 1.01    | 75                       | Very low                  |
| Colorectal cancer   | Highest vs. lowest | 2                    | 1.05      | 0.75, 1.47    | 32                       | Very low                  |
| Hypertension        | Highest vs. lowest | 2                    | 0.97      | 0.91, 1.04    | 0                        | Very low                  |

## ESM Ref

1. Buijsse B, Feskens EJ, Kok FJ, Kromhout D (2006) Cocoa intake, blood pressure, and cardiovascular mortality: the Zutphen Elderly Study. *Arch Intern Med* 166 (4):411-417. doi:10.1001/archinte.166.4.411
2. Arts IC, Hollman PC, Feskens EJ, Bueno de Mesquita HB, Kromhout D (2001) Catechin intake might explain the inverse relation between tea consumption and ischemic heart disease: the Zutphen Elderly Study. *Am J Clin Nutr* 74 (2):227-232. doi:10.1093/ajcn/74.2.227
3. Diaz-Lopez A, Bullo M, Martinez-Gonzalez MA, Corella D, Estruch R, Fito M, Gomez-Gracia E, Fiol M, Garcia de la Corte FJ, Ros E, Babio N, Serra-Majem L, Pinto X, Munoz MA, Frances F, Buil-Cosiales P, Salas-Salvado J (2016) Dairy product consumption and risk of type 2 diabetes in an elderly Spanish Mediterranean population at high cardiovascular risk. *Eur J Nutr* 55 (1):349-360. doi:10.1007/s00394-015-0855-8
4. Dower JI, Geleijnse JM, Hollman P, Soedamah-Muthu SS, Kromhout D (2016) Dietary epicatechin intake and 25-y risk of cardiovascular mortality: the Zutphen Elderly Study. *Am J Clin Nutr* 104 (1):58-64. doi:10.3945/ajcn.115.128819
5. Ivey KL, Hodgson JM, Croft KD, Lewis JR, Prince RL (2015) Flavonoid intake and all-cause mortality. *Am J Clin Nutr* 101 (5):1012-1020. doi:10.3945/ajcn.113.073106
6. Ponzo V, Goitre I, Fadda M, Gambino R, De Francesco A, Soldati L, Gentile L, Magistrini P, Cassader M, Bo S (2015) Dietary flavonoid intake and cardiovascular risk: a population-based cohort study. *Journal of translational medicine* 13:218. doi:10.1186/s12967-015-0573-2
7. Semba RD, Ferrucci L, Bartali B, Urpi-Sarda M, Zamora-Ros R, Sun K, Cherubini A, Bandinelli S, Andres-Lacueva C (2014) Resveratrol levels and all-cause mortality in older

community-dwelling adults. *JAMA Intern Med* 174 (7):1077-1084.

doi:10.1001/jamainternmed.2014.1582

8. Vogiatzoglou A, Mulligan AA, Bhaniani A, Lentjes MAH, McTaggart A, Luben RN, Heiss C, Kelm M, Merx MW, Spencer JPE, Schroeter H, Khaw KT, Kuhnle GGC (2015) Associations between flavan-3-ol intake and CVD risk in the Norfolk cohort of the European Prospective Investigation into Cancer (EPIC-Norfolk). *Free Radic Biol Med* 84:1-10.

doi:10.1016/j.freeradbiomed.2015.03.005

9. Balboa-Castillo T, Lopez-Garcia E, Leon-Munoz LM, Perez-Tasigchana RF, Banegas JR, Rodriguez-Artalejo F, Guallar-Castillon P (2015) Chocolate and health-related quality of life: a prospective study. *PLoS One* 10 (4):e0123161. doi:10.1371/journal.pone.0123161

10. Crichton GE, Elias MF, Alkerwi A, Stranges S, Abhayaratna WP (2016) Relation of Habitual Chocolate Consumption to Arterial Stiffness in a Community-Based Sample: Preliminary Findings. *Pulse (Basel, Switzerland)* 4 (1):28-37. doi:10.1159/000445876

11. Frost L, Vestergaard P (2005) Caffeine and risk of atrial fibrillation or flutter: the Danish Diet, Cancer, and Health Study. *Am J Clin Nutr* 81 (3):578-582.

doi:10.1093/ajcn/81.3.578

12. Jhee JH, Nam KH, An SY, Cha MU, Lee M, Park S, Kim H, Yun HR, Kee YK, Park JT, Chang TI, Kang EW, Yoo TH, Kang SW, Han SH (2018) Effects of Coffee Intake on Incident Chronic Kidney Disease: A Community-Based Prospective Cohort Study. *Am J Med* 131 (12):1482-1490.e1483. doi:10.1016/j.amjmed.2018.05.021

13. Khawaja O, Petrone AB, Kanjwal Y, Gaziano JM, Djousse L (2015) Chocolate Consumption and Risk of Atrial Fibrillation (from the Physicians' Health Study). *Am J Cardiol* 116 (4):563-566. doi:10.1016/j.amjcard.2015.05.009

14. Mostofsky E, Berg Johansen M, Tjonneland A, Chahal HS, Mittleman MA, Overvad K (2017) Chocolate intake and risk of clinically apparent atrial fibrillation: the Danish Diet, Cancer, and Health Study. *Heart* 103 (15):1163-1167. doi:10.1136/heartjnl-2016-310357

15. Saftlas AF, Triche EW, Beydoun H, Bracken MB (2010) Does chocolate intake during pregnancy reduce the risks of preeclampsia and gestational hypertension? *Annals of epidemiology* 20 (8):584-591. doi:10.1016/j.annepidem.2010.05.010
16. Stellman SD, Garfinkel L (1988) Patterns of artificial sweetener use and weight change in an American Cancer Society prospective study. *Appetite* 11 Suppl 1:85-91
17. Strandberg TE, Strandberg AY, Pitkala K, Salomaa VV, Tilvis RS, Miettinen TA (2008) Chocolate, well-being and health among elderly men. *Eur J Clin Nutr* 62 (2):247-253. doi:10.1038/sj.ejcn.1602707
18. Triche EW, Grosso LM, Belanger K, Darefsky AS, Benowitz NL, Bracken MB (2008) Chocolate consumption in pregnancy and reduced likelihood of preeclampsia. *Epidemiology (Cambridge, Mass)* 19 (3):459-464. doi:10.1097/EDE.0b013e31816a1d17
19. Uccella S, Mariani A, Wang AH, Vierkant RA, Cliby WA, Robien K, Anderson KE, Cerhan JR (2013) Intake of coffee, caffeine and other methylxanthines and risk of Type I vs Type II endometrial cancer. *Br J Cancer* 109 (7):1908-1913. doi:10.1038/bjc.2013.540
20. di Giuseppe R, Di Castelnuovo A, Centritto F, Zito F, De Curtis A, Costanzo S, Vohnout B, Sieri S, Krogh V, Donati MB, de Gaetano G, Iacoviello L (2008) Regular consumption of dark chocolate is associated with low serum concentrations of C-reactive protein in a healthy Italian population. *J Nutr* 138 (10):1939-1945. doi:10.1093/jn/138.10.1939
